# Supplementary material
Source: PubMed Central journal article supplement (PMC4167399)
Supplement: NIHMS605956-supplement-1.pdf [file NIHMS605956-supplement-1.pdf]

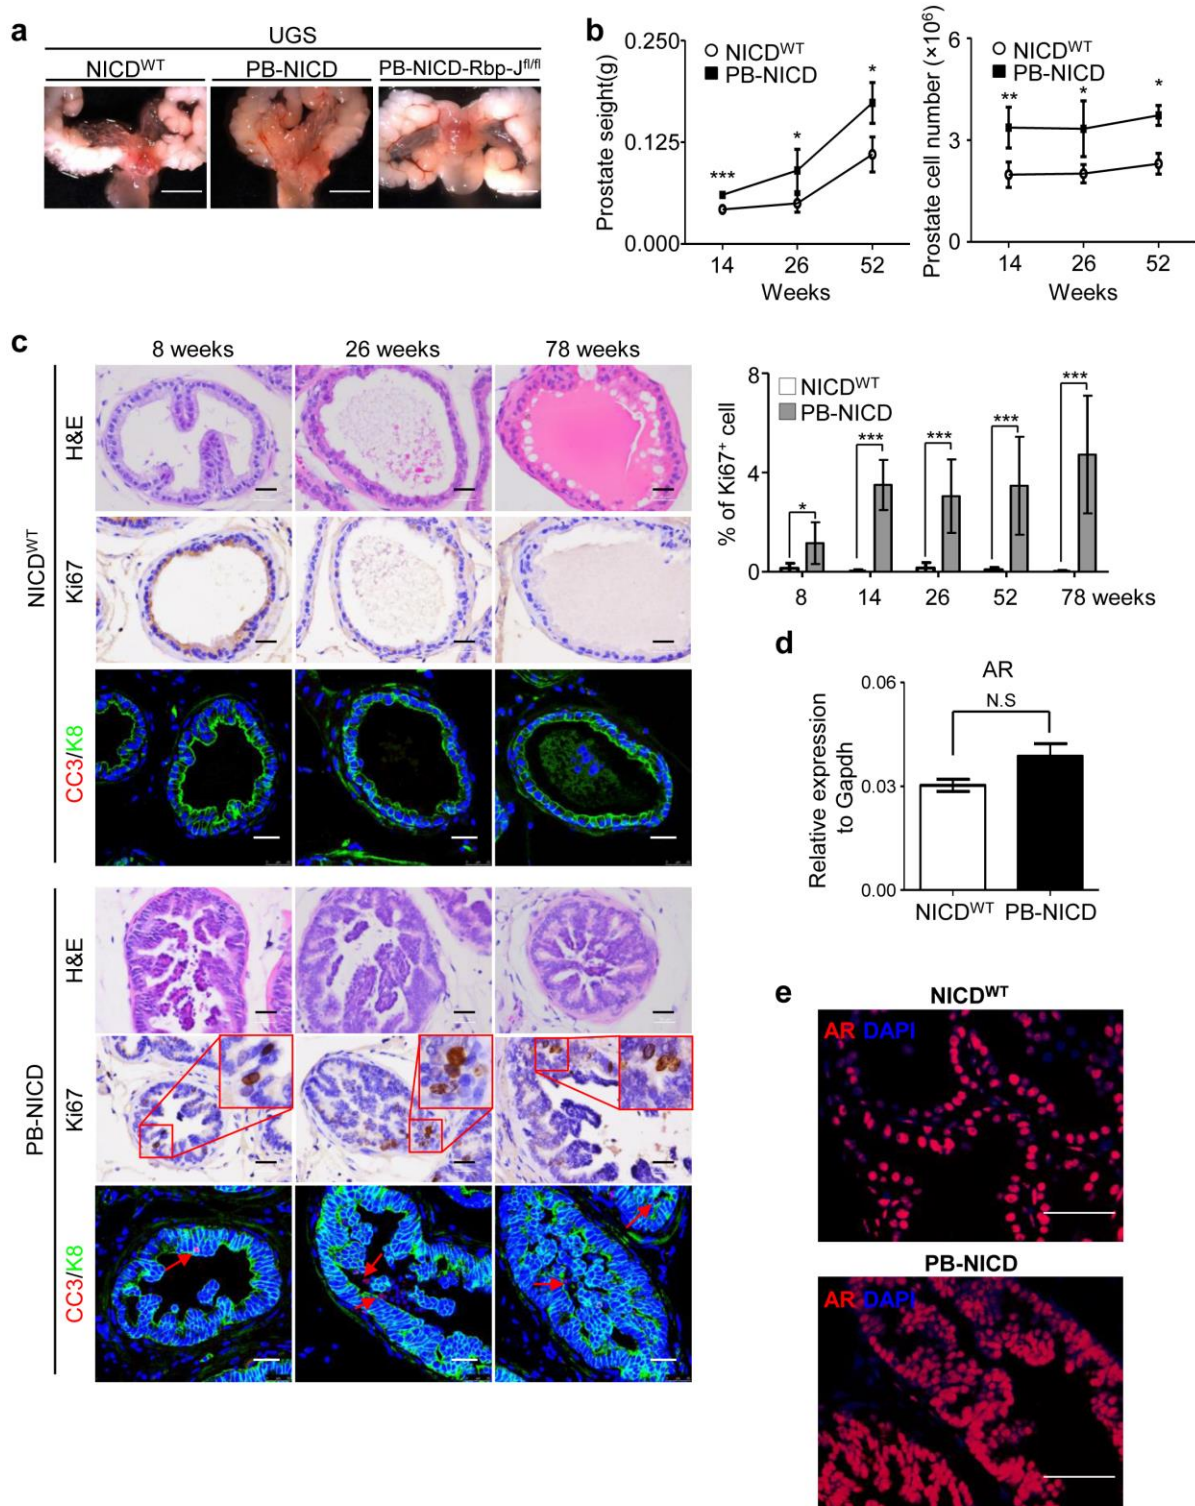

**Supplementary Fig. 1: Canonical Notch signaling induces prostate epithelial proliferation.**

(a) Transillumination images of urogenital organs of NICD<sup>WT</sup>, PB-NICD and PB-NICD-Rbp-J<sup>fl/fl</sup> mice. (b) Prostate weights and prostate cell numbers of NICD<sup>WT</sup> and PB-NICD

mice at 14, 26, and 52 weeks of age. Data represent means  $\pm$  s.d. from 3 mice per group. **(c)** H&E staining and IHC analyses of Ki67, cleaved Caspase 3 (CC3) and K8 of NICD<sup>WT</sup> and PB-NICD mouse prostates. Red arrows point to CC3<sup>+</sup> cells. Bar graph shows quantification of Ki67<sup>+</sup> cells. Data represent means  $\pm$  s.d. from 3-5 mice at each time points per group. **(d-e)** qRT-PCR and IHC analysis of AR expression in NICD<sup>WT</sup> and PB-NICD mouse prostates. Scale bars, 4mm (a); 25 $\mu$ m (c); 50 $\mu$ m (e). Data represent means  $\pm$  s.d. from 3 pairs of mice. Statistical significance was calculated using the *t*-test (\*:  $p < 0.05$ , \*\*:  $p < 0.01$ , \*\*\*:  $p < 0.001$ ).

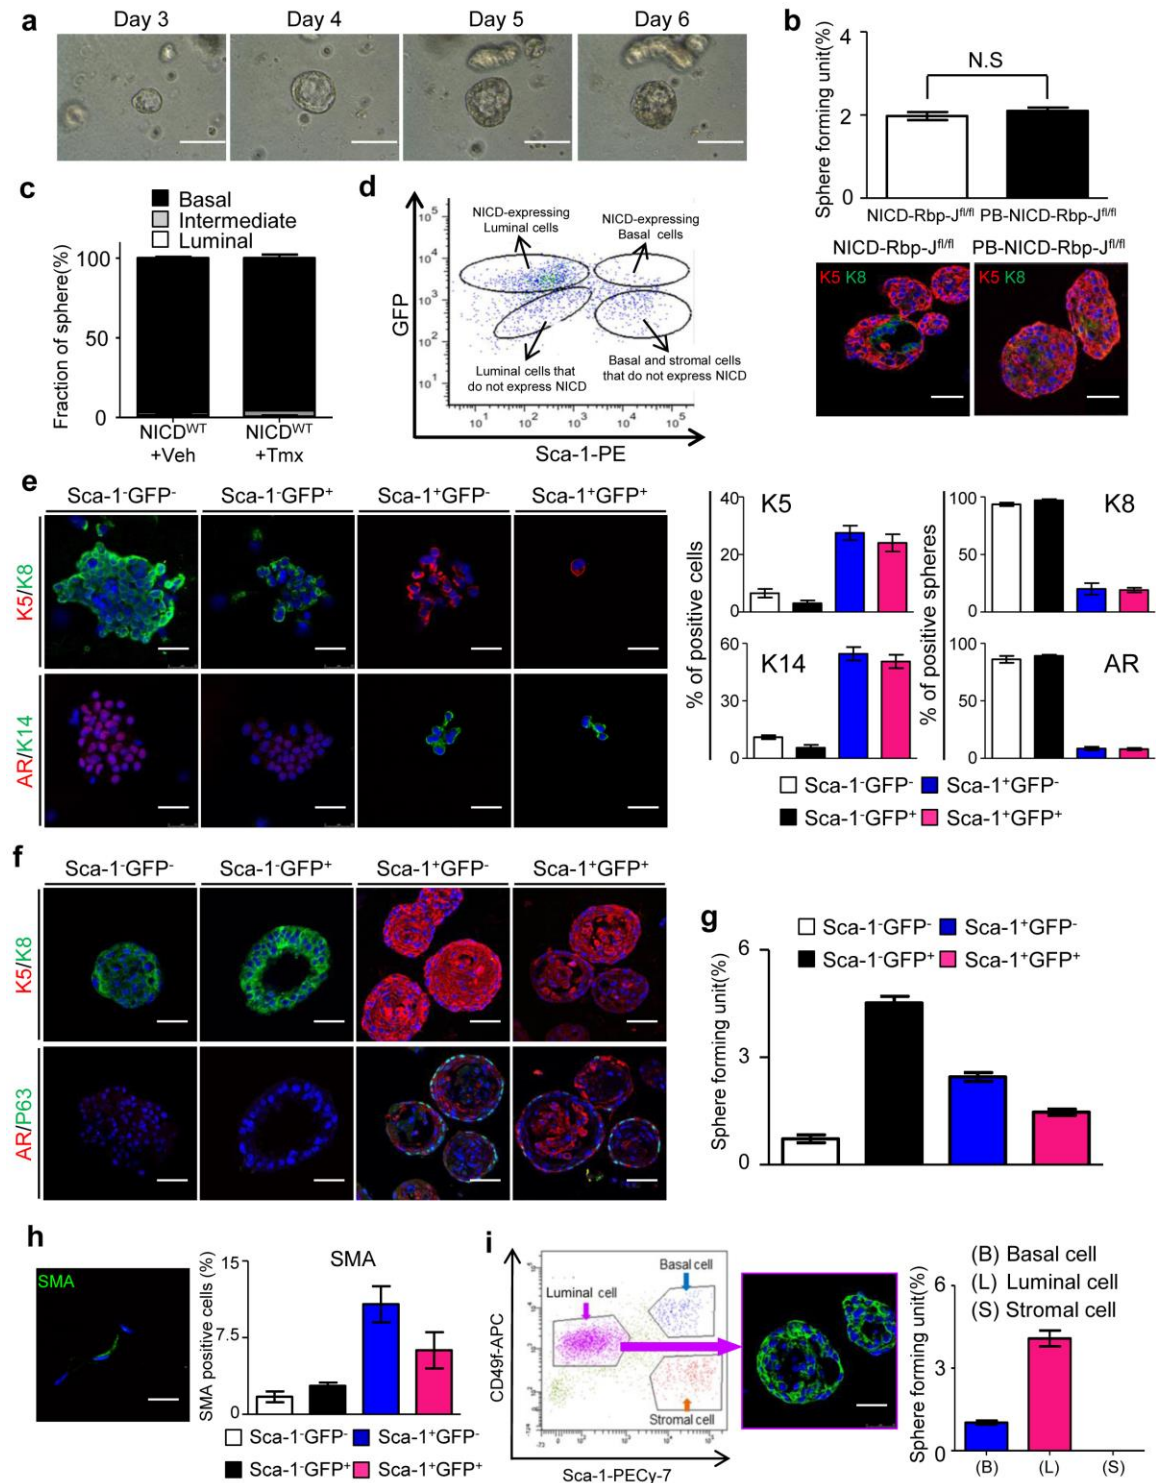

**Supplementary Fig. 2: Luminal prostate spheres were generated from NICD-expressing luminal cells in PB-NICD mice.**

(a) Time-lapse transillumination images of luminal prostate spheres. (b) Formation of luminal spheres is dependent on canonical Notch signaling. Bar graph quantifies sphere-forming units of NICD-Rbp-J<sup>fl/fl</sup> and PB-NICD-Rbp-J<sup>fl/fl</sup> prostate cells. Data represent

means  $\pm$  s.d. from 3 pairs of mice. Images show IHC analyses of K5 and K8 in prostate spheres generated from NICD-Rbp-J<sup>fl/fl</sup> and PB-NICD-Rbp-J<sup>fl/fl</sup> mouse prostate cells. **(c)** Tamoxifen treatment does not induce formation of luminal prostate spheres from NICD<sup>WT</sup> cells. Data represent means  $\pm$  s.d. from 3 mice per group. **(d)** FACS plot of PB-NICD mouse prostate cells based on Sca-1 and GFP expression. **(e)** Immunocytochemical analyses of K5, K8, K14 and AR on cytopins of the four FACS-sorted populations. Bar graphs on the right show quantifications. Bar graphs in e, g, and h show means  $\pm$  s.d. from 3 independent experiments. **(f)** Immunohistochemical analyses of K5, K8, P63 and AR in prostate spheres generated from the four FACS-sorted populations. **(g)** Bar graph quantifies the sphere-forming units of the 4 FACS-sorted populations. **(h)** Immunocytochemical analysis of smooth muscle actin (SMA) and bar graph quantification confirm that SMA expression is enriched in Sca-1<sup>+</sup> cells that included stromal cells. **(i)** Only FACS-sorted Lin<sup>-</sup>Sca-1<sup>-</sup>CD49f<sup>low</sup> cells in PB-NICD mice generated prostate luminal spheres. Scale bars, 100 $\mu$ m (a); 25 $\mu$ m (b, e, f, h, i). Data represent means  $\pm$  s.d. from 3 different experiments using 2-4 mice in each experiment.

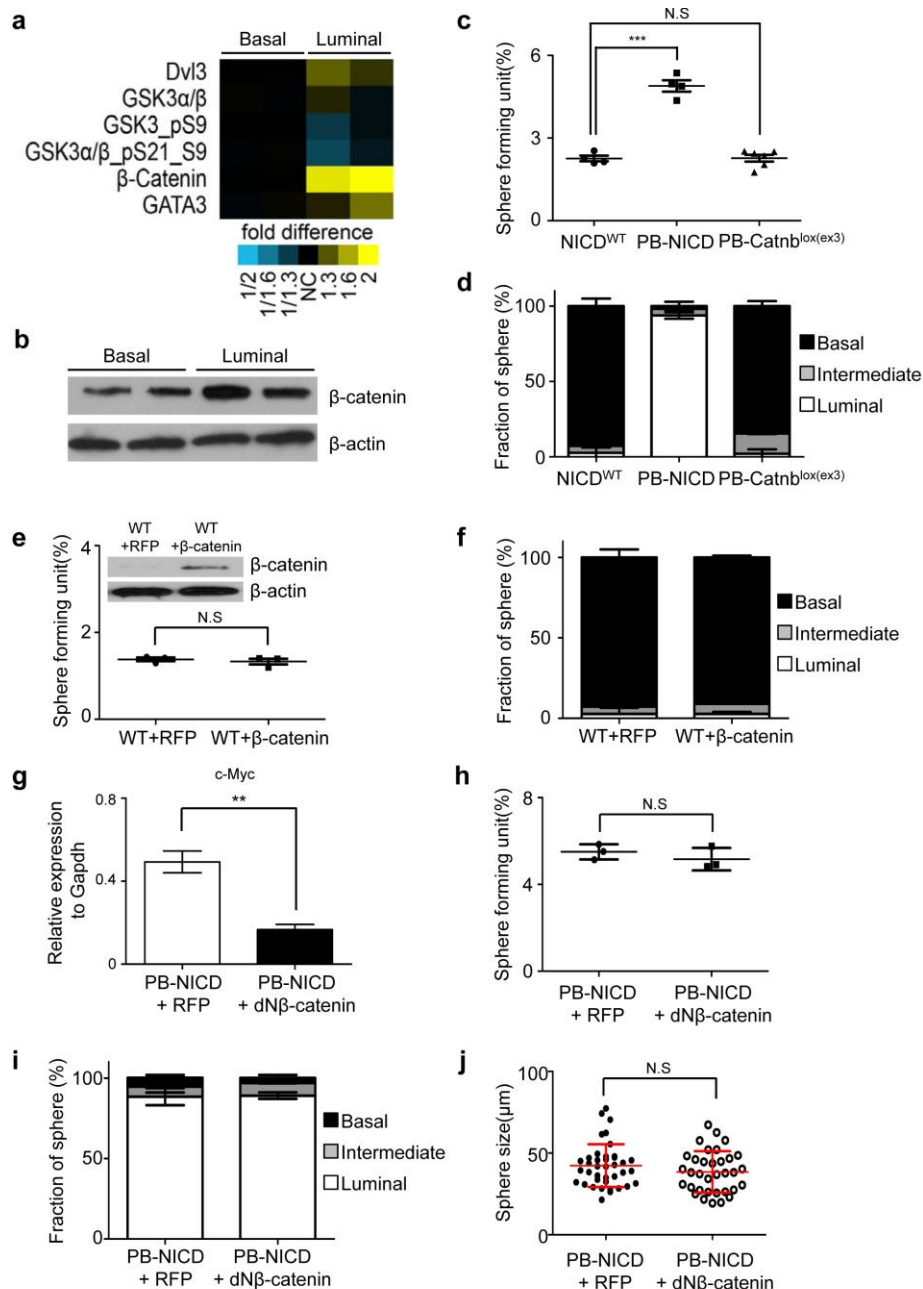

**Supplementary Fig. 3: β-catenin transcriptional activity is neither essential nor sufficient for the formation of PB-NICD luminal spheres.**

(a) Reverse phase protein array shows expression of several Wnt signaling components in basal and luminal prostate sphere cells. (b) Western blot analysis of β-catenin in basal and luminal prostate sphere cells. Individual lanes represent independent samples. (c,d) Quantification of sphere-forming units and the types of prostate spheres generated from prostate cells of NICD<sup>WT</sup>, PB-NICD and PB-Catnb<sup>lox(ex3)</sup> mice. Data represent means ± s.d. from 3 mice per group. (e,f) β-catenin is not sufficient to drive the formation of luminal prostate spheres. Dot (e) and bar (f) graphs quantify the sphere-forming units and the types of prostate spheres generated from WT prostate cells that have been infected by RFP lentivirus and β-catenin lentivirus separately. Data represent means ± s.d. from one

of the two independent experiments. Data represent means  $\pm$  s.d. from 3 independent experiments. **(g)** Ectopic expression of dominant negative  $\beta$ -catenin in PB-NICD luminal prostate cells suppresses c-Myc expression. Data represent means  $\pm$  s.d. from 3 independent experiments. **(h-j)**  $\beta$ -catenin transcriptional activity is not essential for the formation of luminal prostate spheres. Dot and bar graphs quantify the sphere-forming units (h) and the types of prostate spheres (i) and the size of prostate spheres (j) generated from PB-NICD prostate cells that have been infected by RFP lentivirus and dominant negative  $\beta$ -catenin lentivirus separately. Data represent means  $\pm$  s.d. from 3 independent experiments. Statistical significance was calculated using the *t*-test (\*\*:  $p < 0.01$ , \*\*\*:  $p < 0.001$ ).

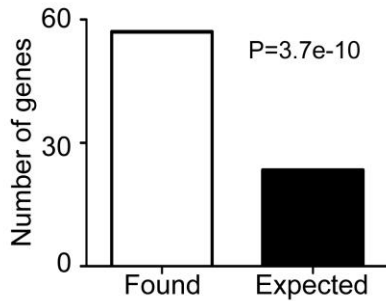

**Supplementary Fig. 4: GO analysis shows that gene ontology group related to AKT activity is enriched in PB-NICD mouse prostates as compared to WT mouse prostates.**

Genes up-regulated by AKT in mouse model of prostate cancer<sup>1</sup> were significantly enriched in the set of genes up-regulated in prostate tissues of PB-NICD mice compared to WT mice (57 shared genes, one-sided Fisher's exact test,  $P = 3.7e-10$ ). Out of 14601 unique genes profiled between the two datasets, 481 were high in our PB-NICD mouse model and 710 were high in the Majumder model ( $P < 0.001$  by *t*-test on log-transformed data, comparing all untreated AKT profiles with untreated WT profiles, using expression dataset GSE3737). Expected shared gene overlap by chance would have been ~24 genes.

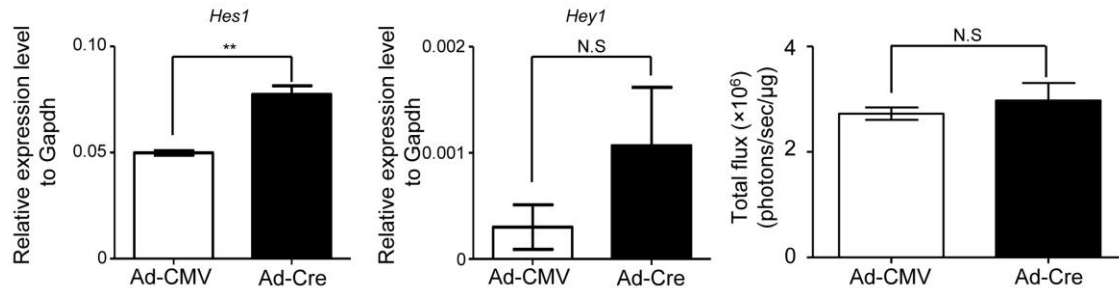

**Supplementary Fig. 5: Increased NICD expression does not affect NF-κB activity in basal prostate sphere cells.**

Basal prostate sphere cells generated from NICD<sup>WT</sup>-NFκB-RE bigenic mice were infected with Ad-CMV and Ad-Cre adenovirus separately. QRT-PCR of *Hes1* and *Hey1* confirmed activation of NICD expression in Ad-Cre infected cells. Bioluminescence imaging showed that NF-κB activity in basal prostate sphere cells was not affected by NICD expression. Data represent means ± s.d. from 2 independent experiments. \*\*:  $p < 0.01$  by t-test.

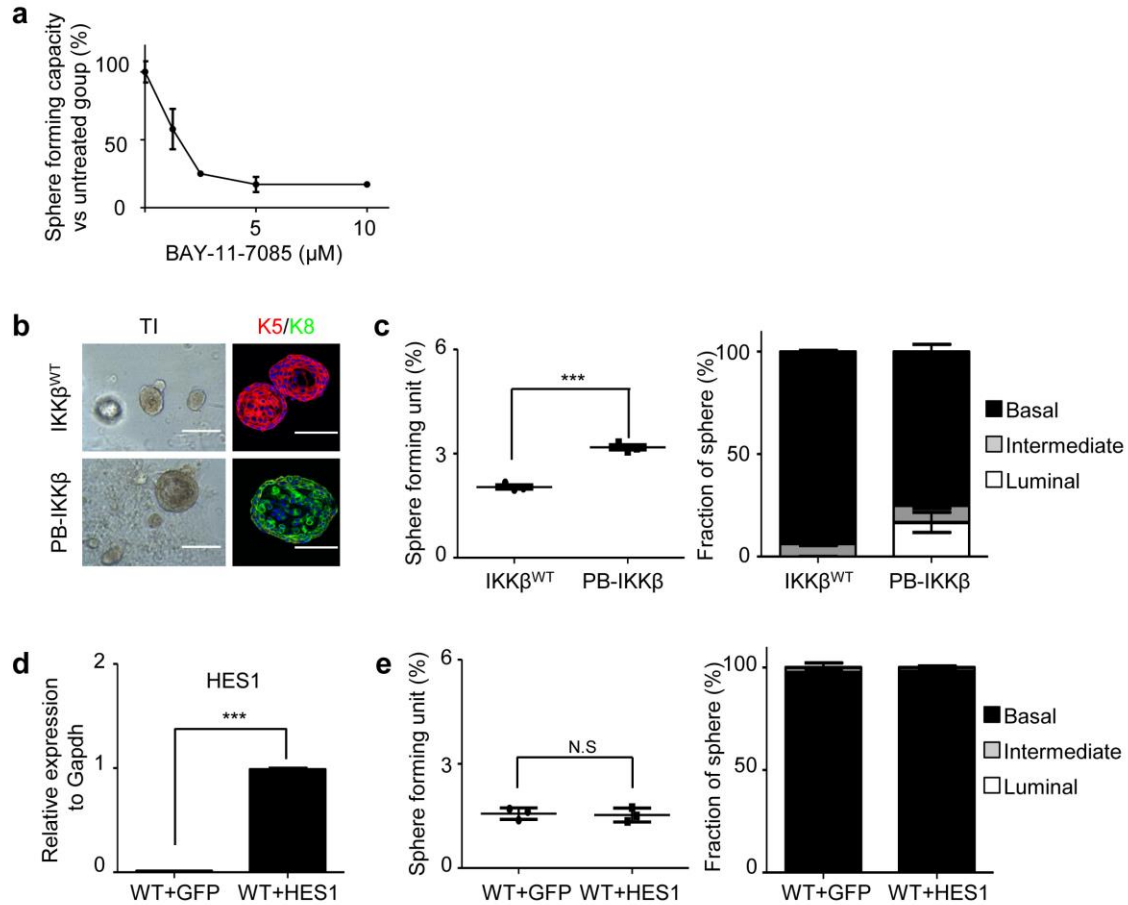

**Supplementary Fig. 6: Notch delays anoikis of luminal progenitors by augmenting NF- $\kappa$ B activities independent of Hes1.**

(a) BAY-11-7085 suppresses basal sphere forming activity in a dosage-dependent manner. Data represent means  $\pm$  s.d. from 3 independent experiments. (b-c) Generation of luminal prostate spheres from ARR2PB-Cre;Rosa26-LSL-IKK $\beta$ <sup>ca</sup> (PB-IKK $\beta$ ) prostate cells. Transillumination (TI) images and IHC analysis of K5 and K8 show the formation of luminal prostate spheres in PB-IKK $\beta$  group (b). Dot and bar graphs (c) quantify the sphere-forming units and the types of prostate spheres in IKK $\beta$ <sup>WT</sup> and PB-IKK $\beta$  groups. Data represent means  $\pm$  s.d. from 3 pairs of mice. (d-e) Hes1 is not sufficient to drive formation of luminal prostate spheres. QRT-PCR analysis confirms ectopic expression of Hes1 by lentivirus (d). Dot and bar graphs (e) quantify the sphere-forming units and the types of prostate spheres generated from WT prostate cells that have been infected by GFP lentivirus and Hes1 lentivirus separately. Scale bars, 100 $\mu$ m (TI, b); 50 $\mu$ m (K5/K8, b). Data represent means  $\pm$  s.d. from 3 independent experiments. Statistical significance was calculated using the *t*-test (\*\*\*: *p* < 0.001).

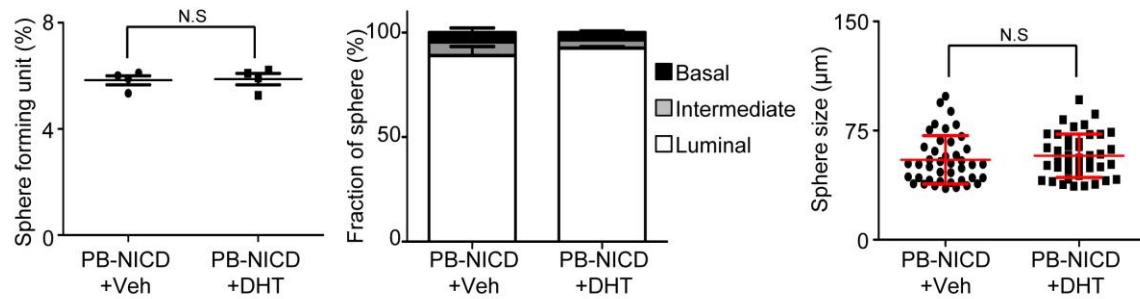

**Supplementary Fig. 7: DHT (di-hydro-testosterone) does not affect formation and growth of luminal prostate spheres from PB-NICD cells.**

One day after the prostate sphere assay was set up, di-hydro-testosterone was added to a final concentration of  $10^{-8}$  M and replaced every other day. Analyses shown in dot and bar graphs indicate that DHT does not affect sphere forming unit, sphere size or the types of spheres generated. Data represent means  $\pm$  s.d. from two independent experiments.

**Supplementary Figure 8 Unedited full-size blots of Fig. 1**

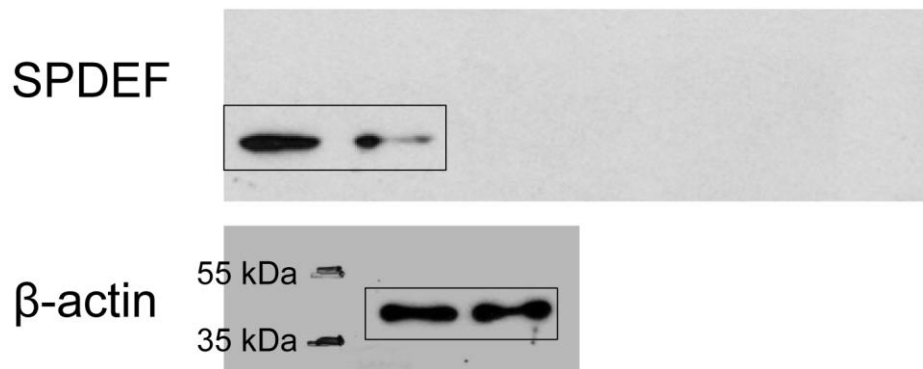

**Supplementary Figure 9, Unedited full-size blots of Fig. 4**

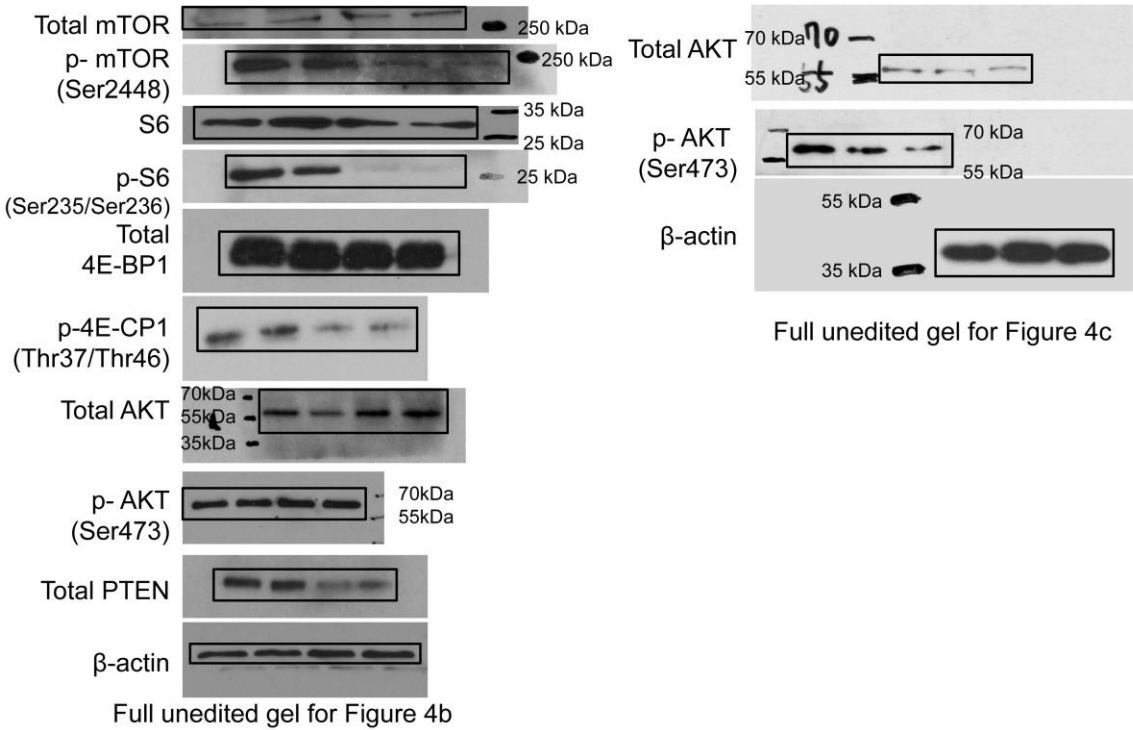

Supplementary Figure 10, Unedited full-size blots of Fig. 5

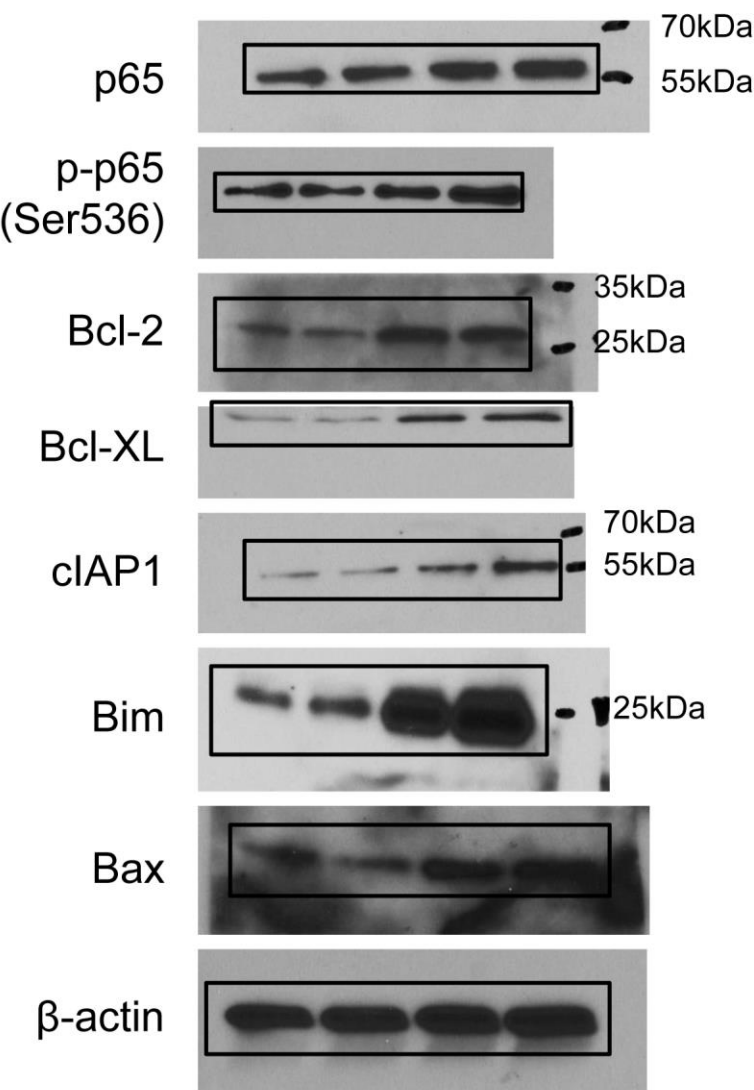

Full unedited gel for Figure 5b

**Supplementary Figure 11, Unedited full-size blots of Fig. 6**

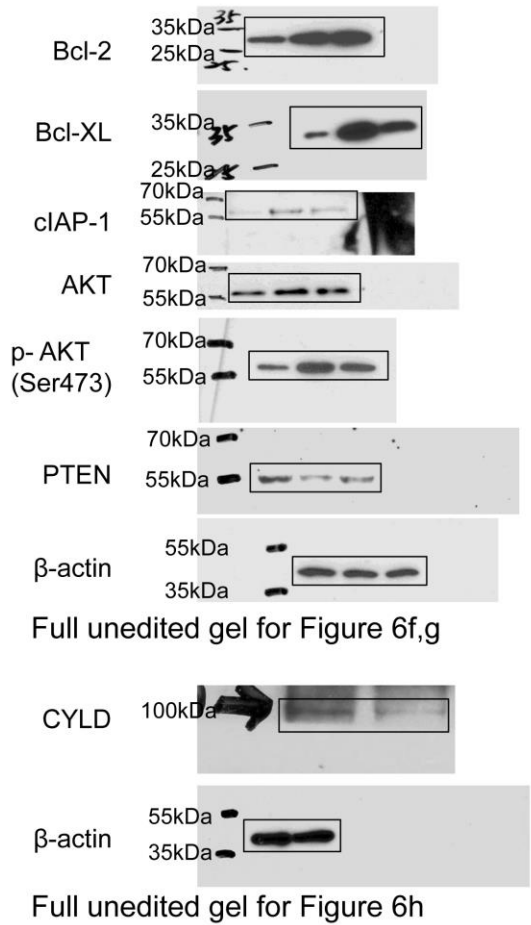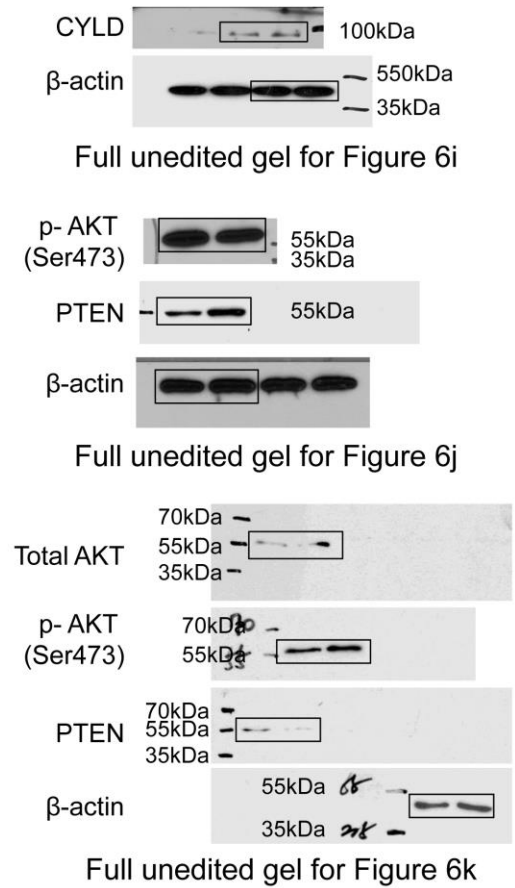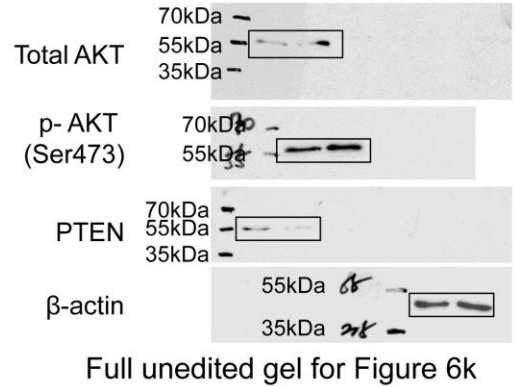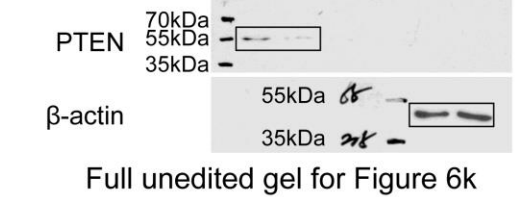

Supplementary Figure 12, Unedited full-size blots of Fig. S3

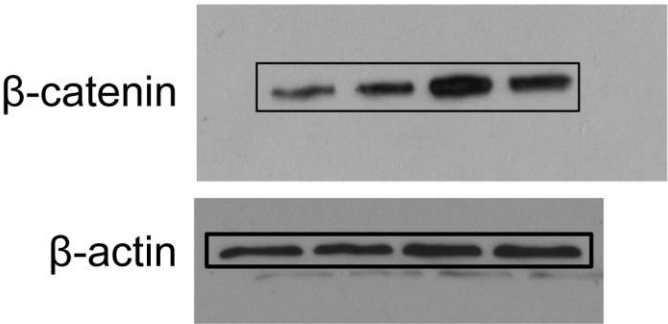

Full unedited gel for Figure S3b

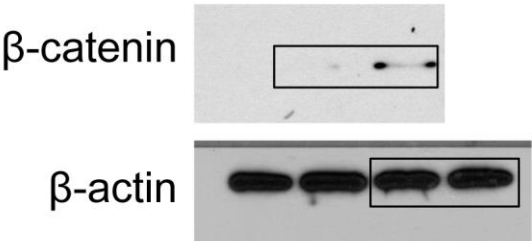

Full unedited gel for Figure S3e

**Supplementary Table 1: Mouse genotyping primers**

| Primers                           | Sequences (5' to 3')           | WT(bp) | TG(bp) |
|-----------------------------------|--------------------------------|--------|--------|
| Cre forward                       | CCTGACAGTGACGGTCCAAAG          | None   | 700    |
| Cre reverse                       | CATGACTCTTCAACTCAAAC           |        |        |
| RBP-J forward                     | GAAGGTCGGTTGACACCAGATAGC       | 250    | 500    |
| RBP-J reverse 1                   | ATGTACATTTTGTACTCACAGAGATGGATG |        |        |
| RBP-J reverse 2                   | TAATGCACACAAGCATTGTCTGAGTTC    |        |        |
| ICN forward                       | TAAGCCTGCCCAGAAGACTC           | 235    | 320    |
| ICN reverse 1                     | GAAAGACCGCGAAGAGTTTG           |        |        |
| ICN reverse 2                     | AAAGTCGCTCTGAGTTGTTAT          |        |        |
| IKK $\beta$ forward               | WT: CCAGATGACTACCTATCCTC       | 350    | 378    |
|                                   | Mut: GCAAGACAGAAGCTTCACGACTC   |        |        |
| IKK $\beta$ reverse               | WT: GAGCTGCAGTGGAGTAGGCG       |        |        |
|                                   | Mut: GCAATATGGTGGAAAATAAC      |        |        |
| AR <sup>fl/y</sup> forward        | AGCCTGTATACTCAGTTGGGG          | 1000   | 900    |
| AR <sup>fl/y</sup> reverse        | AATGCAGCATCACATTAAGTTGATACC    |        |        |
| Catnb <sup>Lox(ex3)</sup> forward | GGTAGGTGAAGCTCAGCGCAGAGC       | 900    | -      |
| Catnb <sup>Lox(ex3)</sup> reverse | ACGTGTGGCAAGTTCCGCGTCATCC      |        |        |
| NF- $\kappa$ B-RE-Luc f           | TGGATTCTAAAACGGATTACCAGGG      | -      | 1000   |
| NF- $\kappa$ B-RE-Luc r           | CCAAAACAACAACGGCGGC            |        |        |

**Supplementary Table 2: Mouse qRT-PCR Primers**

| Primers         | Sequences (5' – 3')    |
|-----------------|------------------------|
| Notch1 forward  | ACTGTGAGGACGAGGTGGAC   |
| Notch1 reverse  | ACAGGCACTCGTTGATCTCC   |
| Hes-1 forward   | GGCCTCTGAGCACAGAAAGT   |
| Hes-1 reverse   | GAATGCCGGGAGCTATCTTT   |
| Hey1 forward    | GGTACCCAGTGCCTTTGAGA   |
| Hey1 reverse    | GTGCGCGTCAAATAACCTT    |
| HeyL forward    | GAAGCGCAGCGGGATCATAG   |
| HeyL reverse    | CTGTTTCTCAAAGGCAGTGG   |
| CcnD1 forward   | GCCCTCCGTATCTTACTTCAAG |
| CcnD1 reverse   | GCGGTCCAGGTAGTTCATG    |
| CcnD2 forward   | GCTGTGCATTTACACCGACA   |
| CcnD2 reverse   | CCACTTCAGCTTACCCAACA   |
| Bcl-2 forward   | AGTACCTGAACCGGCATCTG   |
| Bcl-2 reverse   | CATGCTGGGGCCATATAGTT   |
| Bcl2-l1 forward | GTTGGATGGCCACCTATCTG   |
| Bcl2-l1 reverse | GCTGCATTGTTCCCGTAGAG   |
| Tgfa forward    | AAGAAGCAAGCCATCACTGC   |
| Tgfa reverse    | AGCAGTGGATCAGCACACAG   |
| Egfr forward    | TGTGCAAAGGAATTACGACCT  |
| Egfr reverse    | GGATTCTCTCCACGGTGTTG   |
| Fgfr2 forward   | TGGAGATGATGAGGACGACA   |
| Fgfr2 reverse   | CTTCTCGGTGTTGGTCCAGT   |
| AR forward      | AATGAGTACCGCATGCACAA   |
| AR reverse      | CCCATCCACTGGAATAATGC   |
| Hspa5 forward   | AAGGAGACTGCTGAGGCGTA   |
| Hspa5 reverse   | TGGGCATCATTGAAGTAAGC   |
| Spink3 forward  | CTTTGGCCCTGCTGAGTTTA   |
| Spink3 reverse  | CCACTGCATCATGGCAACTA   |
| Pbsn forward    | TTCCGTCACATTTTGTGTGG   |
| Pbsn reverse    | CAGTTGGCACTTAGTCCCTTTC |
| Prdx6 forward   | GAGGATCATCTTGCCTGGAG   |
| Prdx6 reverse   | AATGATGGGAAATGGCAACT   |
| Igbp1 forward   | GCCTATCCAAATCTCGTTGC   |
| Igbp1 reverse   | TGCAGACAACCTATGCTCCA   |
| Azgp1 forward   | CCTTGTGACCCTGAAAGACA   |
| Azgp1 reverse   | ATCTCGCAACCAAACATTCC   |
| Msemb forward   | TGGTGATAGCATCCAAAGCA   |

|                 |                       |
|-----------------|-----------------------|
| Msmb reverse    | AGCATCCATGCAGTCATCAG  |
| Car2 forward    | GGCTCTGAGCACACTGTGAA  |
| Car2 reverse    | GTTGCTGCACAGCTTTTCC   |
| Calr forward    | AAGGGCAAGAATGTGCTGAT  |
| Calr reverse    | GCCGCACAATCAGTGTGTAT  |
| Sbp forward     | GCATGCGGATCTTCTTAAGTG |
| Sbp reverse     | TCTGACCGGGTTCCATAGAC  |
| Fam115e forward | GCCCTTCCCTTTTCAGAGAG  |
| Fam115e reverse | TGGGGTATCCAGAATGAAGG  |
| Pdia3 forward   | GCTTGCCCCTGAGTATGAAG  |
| Pdia3 reverse   | CAGGTGTTTGTGTTGGCAGT  |
| Spdef forward   | GGGCGAGGTCCTGAAAGATA  |
| Spdef reverse   | AAAAGCCACTTCTGCACGTT  |
| cMyc forward    | AGTGCTGCATGAGGAGACAC  |
| cMyc reverse    | GGTTTGCCTCTTCTCCACAG  |

**Supplementary Table 3: Antibodies for IHC and Western blot**

| Antigen          | Supplier               | Species | Dilution |
|------------------|------------------------|---------|----------|
| K5               | Covance #PRB-160P      | Rabbit  | 1:2000   |
| K8               | Covance #MMS-162P      | Mouse   | 1:1000   |
| K14              | Biogenex MU146-UC      | Mouse   | 1:100    |
| GFP              | Clontech, JL8          | Mouse   | 1:1000   |
| P63              | Santa Cruz, 4A4        | Mouse   | 1:200    |
| Ki67             | Novocastra, NCL-Ki67-P | Rabbit  | 1:1000   |
| AR               | Santa Cruz, sc-816     | Rabbit  | 1:200    |
| NICD             | Santa Cruz, sc-6014-R  | Rabbit  | 1:1000   |
| Cleaved caspase3 | Cell Signaling, 9661S  | Rabbit  | 1:1000   |
| $\beta$ -actin   | Sigma, A5441           | Mouse   | 1:5000   |
| AKT1             | Cell Signaling, 9272   | Rabbit  | 1:1000   |
| phoAKT           | Cell Signaling, 4060   | Rabbit  | 1:1000   |
| S6               | Cell Signaling, 2217   | Rabbit  | 1:1000   |
| pS6              | Cell Signaling, 4857   | Rabbit  | 1:1000   |
| 4E-BP1           | Cell Signaling, 9644   | Rabbit  | 1:1000   |
| pho4E-BP1        | Cell Signaling, 2855   | Rabbit  | 1:1000   |
| mTOR             | Cell Signaling, 2983   | Rabbit  | 1:250    |
| phomTOR          | Cell Signaling, 5536   | Rabbit  | 1:250    |
| Pten             | Cell Signaling, 9559   | Rabbit  | 1:1000   |
| $\beta$ -catenin | Cell Signaling, 9582   | Rabbit  | 1:1000   |
| Bcl-2            | Cell Signaling, 2870   | Rabbit  | 1:1000   |
| Bcl-xL           | Cell Signaling, 1764   | Rabbit  | 1:1000   |
| Bim              | Cell Signaling, 2933   | Rabbit  | 1:500    |
| Bax              | Cell Signaling, 2772   | Rabbit  | 1:500    |
| cIAP1            | Cell Signaling, 4952   | Rabbit  | 1:500    |

|                      |                                |        |        |
|----------------------|--------------------------------|--------|--------|
| Cyld                 | Cell Signaling, 8462           | Rabbit | 1:1000 |
| RelA/P65             | Cell Signaling, 8242           | Rabbit | 1:1000 |
| phoRelA/P65          | Cell Signaling, 3033           | Rabbit | 1:1000 |
| $\alpha$ -Mouse      | Rockland, IRDye800 610-732-002 | Donkey | 1:5000 |
| $\alpha$ -Rabbit     | Rockland, IRDye700 611-130-002 | Goat   | 1:5000 |
| $\alpha$ -Mouse HRP  | Vector Lab. PI-2000            | Goat   | 1:5000 |
| $\alpha$ -Rabbit HRP | Vector Lab. PI-1000            | Goat   | 1:5000 |

### Supplementary references

1. Majumder, P.K., *et al.* Prostate intraepithelial neoplasia induced by prostate restricted Akt activation: the MPAKT model. *Proc Natl Acad Sci U S A* **100**, 7841-7846 (2003).
